# Supplementary material for: Alzheimer's disease‐like neuropathology in three species of oceanic dolphin
Source: PubMed Central journal article supplement (PMC10947196; doi:10.1111/ejn.15900), 2022-12-27

**A**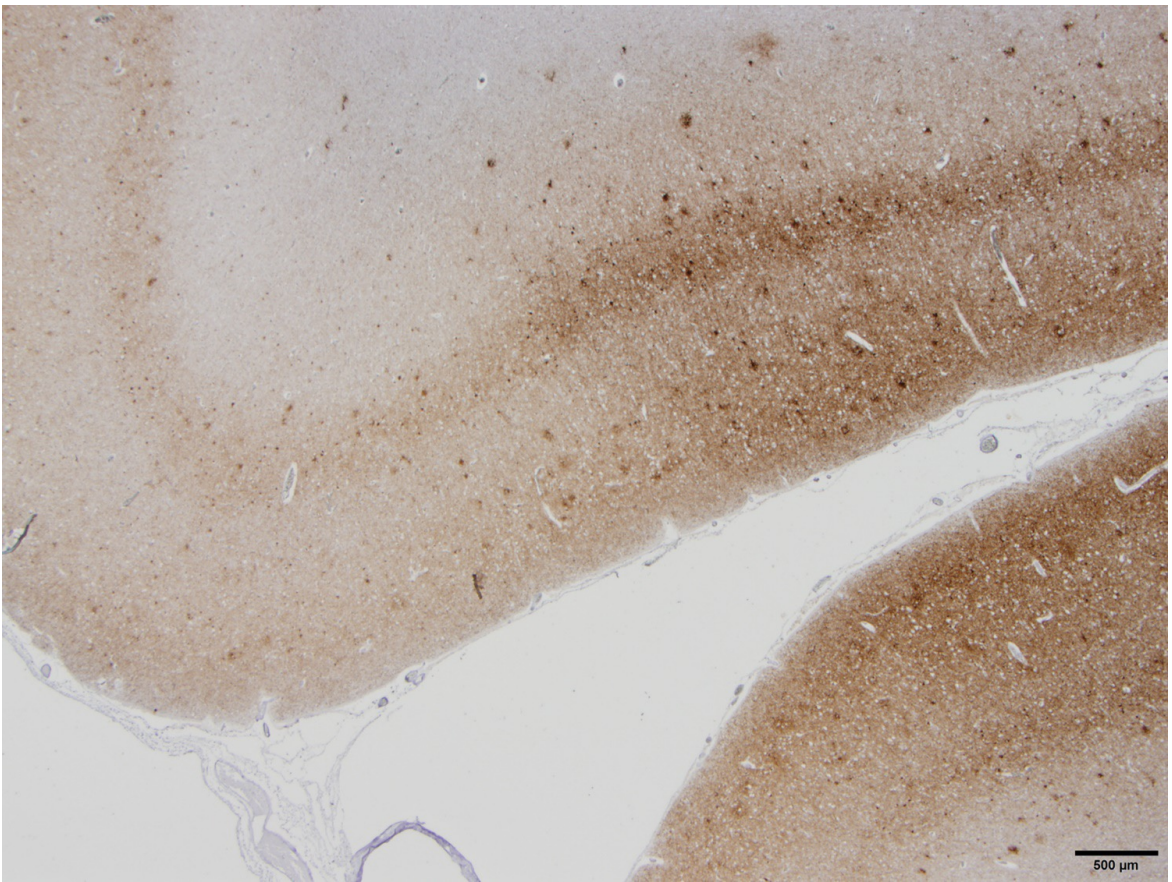**B**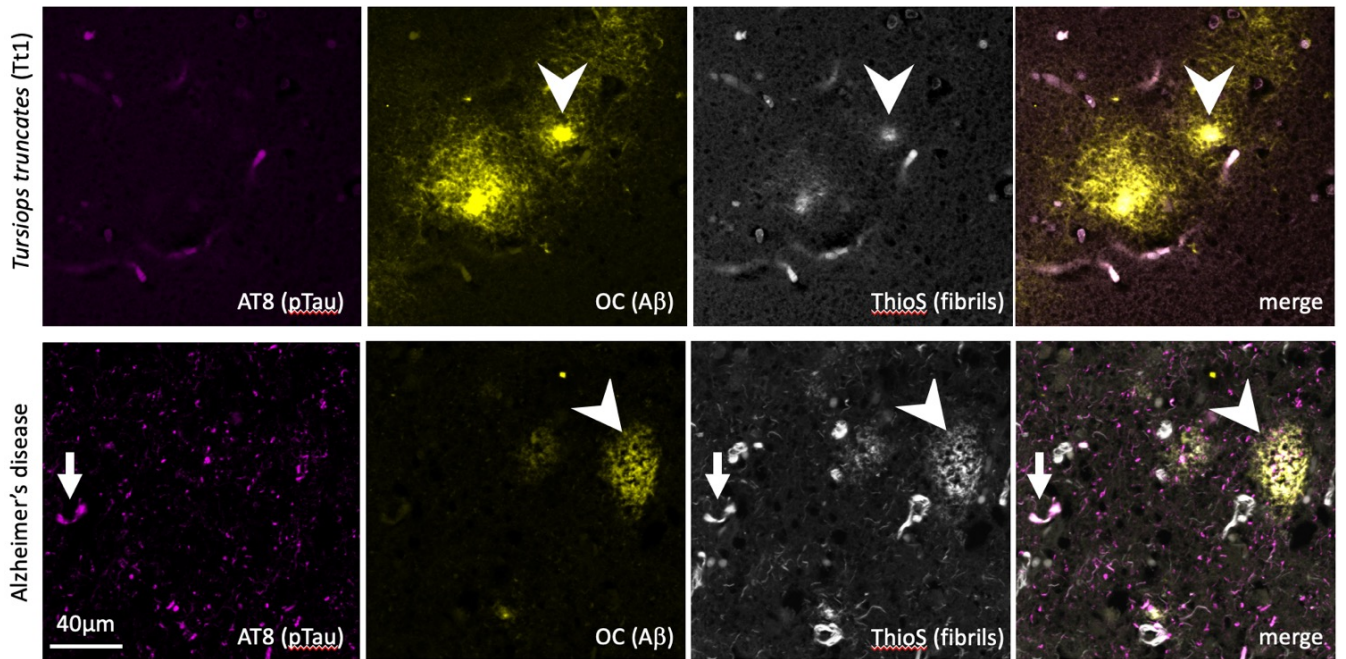

Supplement: EJN-57-1161-s001.pdf [file EJN-57-1161-s001.pdf]
